# Supplementary material for: Rickettsial Illnesses as Important Causes of Febrile Illness in Chittagong, Bangladesh
Source: PubMed Central journal article supplement (PMC5875266; doi:10.3201/eid2404.170190), 2018-04
Supplement: 17-0190-Techapp-s1.pdf [file 17-0190-Techapp-s1.pdf]

# Rickettsial Illnesses as Important Causes of Febrile Illness in Chittagong, Bangladesh

## Technical Appendix

**Technical Appendix Table.** Pairwise gene-gene sequence similarity values between Bangladesh *O. tsutsugamushi* and reference strains

| Karp    | psv * | Gilliam | psv  | Kato    | psv  | TA763   | psv  | TA716   | psv  | Kawasaki | psv  | Thai UT76 | psv  |
|---------|-------|---------|------|---------|------|---------|------|---------|------|----------|------|-----------|------|
| SW122   | 0.05  | SW169   | 0.03 | SW228   | 0.06 | SW275   | 0.02 | SW275   | 0.20 | SW169    | 0.12 | SW223     | 0.00 |
| SW170   | 0.05  | SW126   | 0.04 | SW123   | 0.25 | SW123   | 0.22 | SW228   | 0.25 | SW126    | 0.13 | SW316     | 0.00 |
| SW187   | 0.05  | SW149   | 0.04 | SW146   | 0.25 | SW146   | 0.22 | SW123   | 0.28 | SW149    | 0.13 | SW97      | 0.00 |
| SW195   | 0.05  | SW241   | 0.04 | SW177   | 0.25 | SW177   | 0.22 | SW146   | 0.28 | SW241    | 0.13 | SW123     | 0.00 |
| SW305   | 0.05  | SW257   | 0.04 | SW183   | 0.25 | SW183   | 0.22 | SW177   | 0.28 | SW257    | 0.13 | SW146     | 0.00 |
| SW305ES | 0.05  | SW310   | 0.04 | SW223   | 0.25 | SW223   | 0.22 | SW183   | 0.28 | SW310    | 0.13 | SW177     | 0.00 |
| SW42ES  | 0.05  | SW140   | 0.18 | SW272   | 0.25 | SW272   | 0.22 | SW223   | 0.28 | SW228    | 0.24 | SW183     | 0.00 |
| SW7     | 0.05  | SW178   | 0.18 | SW316   | 0.25 | SW316   | 0.22 | SW272   | 0.28 | SW123    | 0.24 | SW272     | 0.00 |
| SW211   | 0.05  | SW213   | 0.18 | SW50    | 0.25 | SW50    | 0.22 | SW316   | 0.28 | SW146    | 0.24 | SW50      | 0.00 |
| SW211EC | 0.05  | SW274   | 0.18 | SW97    | 0.26 | SW97    | 0.22 | SW50    | 0.28 | SW177    | 0.24 | SW140     | 0.03 |
| SW211ES | 0.05  | SW300   | 0.18 | SW140   | 0.26 | SW211   | 0.23 | SW97    | 0.28 | SW183    | 0.24 | SW178     | 0.03 |
| SW123   | 0.05  | SW33    | 0.18 | SW178   | 0.26 | SW211EC | 0.23 | SW122   | 0.30 | SW223    | 0.24 | SW213     | 0.03 |
| SW146   | 0.05  | SW60    | 0.18 | SW213   | 0.26 | SW211ES | 0.23 | SW170   | 0.30 | SW272    | 0.24 | SW274     | 0.03 |
| SW177   | 0.05  | SW123   | 0.18 | SW274   | 0.26 | SW122   | 0.23 | SW187   | 0.30 | SW316    | 0.24 | SW300     | 0.03 |
| SW183   | 0.05  | SW146   | 0.18 | SW300   | 0.26 | SW170   | 0.23 | SW195   | 0.30 | SW50     | 0.24 | SW33      | 0.03 |
| SW223   | 0.05  | SW177   | 0.18 | SW33    | 0.26 | SW187   | 0.23 | SW305   | 0.30 | SW97     | 0.24 | SW60      | 0.03 |
| SW272   | 0.05  | SW183   | 0.18 | SW60    | 0.26 | SW195   | 0.23 | SW305ES | 0.30 | SW140    | 0.25 | SW122     | 0.06 |
| SW316   | 0.05  | SW223   | 0.18 | SW169   | 0.26 | SW305   | 0.23 | SW42ES  | 0.30 | SW178    | 0.25 | SW170     | 0.06 |
| SW50    | 0.05  | SW272   | 0.18 | SW126   | 0.27 | SW305ES | 0.23 | SW7     | 0.30 | SW213    | 0.25 | SW187     | 0.06 |
| SW97    | 0.06  | SW316   | 0.18 | SW149   | 0.27 | SW42ES  | 0.23 | SW140   | 0.30 | SW274    | 0.25 | SW195     | 0.06 |
| SW140   | 0.06  | SW50    | 0.18 | SW241   | 0.27 | SW7     | 0.23 | SW178   | 0.30 | SW300    | 0.25 | SW305     | 0.06 |
| SW178   | 0.06  | SW97    | 0.19 | SW257   | 0.27 | SW140   | 0.24 | SW213   | 0.30 | SW33     | 0.25 | SW305ES   | 0.06 |
| SW213   | 0.06  | SW211   | 0.19 | SW310   | 0.27 | SW178   | 0.24 | SW274   | 0.30 | SW60     | 0.25 | SW42ES    | 0.06 |
| SW274   | 0.06  | SW211EC | 0.19 | SW211   | 0.28 | SW213   | 0.24 | SW300   | 0.30 | SW211    | 0.25 | SW7       | 0.06 |
| SW300   | 0.06  | SW211ES | 0.19 | SW211EC | 0.28 | SW274   | 0.24 | SW33    | 0.30 | SW211EC  | 0.25 | SW211     | 0.07 |
| SW33    | 0.06  | SW122   | 0.19 | SW211ES | 0.28 | SW300   | 0.24 | SW60    | 0.30 | SW211ES  | 0.25 | SW211EC   | 0.07 |
| SW60    | 0.06  | SW170   | 0.19 | SW122   | 0.28 | SW33    | 0.24 | SW211   | 0.30 | SW275    | 0.26 | SW211ES   | 0.07 |
| SW169   | 0.21  | SW187   | 0.19 | SW170   | 0.28 | SW60    | 0.24 | SW211EC | 0.30 | SW122    | 0.26 | SW126     | 0.20 |
| SW275   | 0.21  | SW195   | 0.19 | SW187   | 0.28 | SW126   | 0.26 | SW211ES | 0.30 | SW170    | 0.26 | SW149     | 0.20 |
| SW126   | 0.21  | SW305   | 0.19 | SW195   | 0.28 | SW149   | 0.26 | SW169   | 0.34 | SW187    | 0.26 | SW241     | 0.20 |
| SW149   | 0.21  | SW305ES | 0.19 | SW305   | 0.28 | SW241   | 0.26 | SW126   | 0.34 | SW195    | 0.26 | SW257     | 0.20 |
| SW241   | 0.21  | SW42ES  | 0.19 | SW305ES | 0.28 | SW257   | 0.26 | SW149   | 0.34 | SW305    | 0.26 | SW310     | 0.20 |
| SW257   | 0.21  | SW7     | 0.19 | SW42ES  | 0.28 | SW310   | 0.26 | SW241   | 0.34 | SW305ES  | 0.26 | SW169     | 0.21 |
| SW310   | 0.21  | SW228   | 0.19 | SW7     | 0.28 | SW169   | 0.26 | SW257   | 0.34 | SW42ES   | 0.26 | SW275     | 0.21 |
| SW228   | 0.24  | SW275   | 0.22 | SW275   | 0.31 | SW228   | 0.29 | SW310   | 0.34 | SW7      | 0.26 | SW228     | 0.23 |

This matrix presents pairwise gene-gene sequence similarity values between *O. tsutsugamushi* samples from Bangladesh and reference strains (partial 56kDa gene sequences). Grading: highest nucleotide sequence similarities (top) to lowest (bottom). Similar sequences with values <0.1 are shaded in gray. The largest proportion of 56kDa gene sequences were similar to the Karp strain, or Karp-like strain (UT76). ES = Eschar swab, EC = eschar crust sample specimens. Calculations performed using MEGA version 7 software. Note: \* psv = these values represent pairwise gene-gene sequence similarity values ranging from 0 (genetically identical) – to 1 (genetically different).

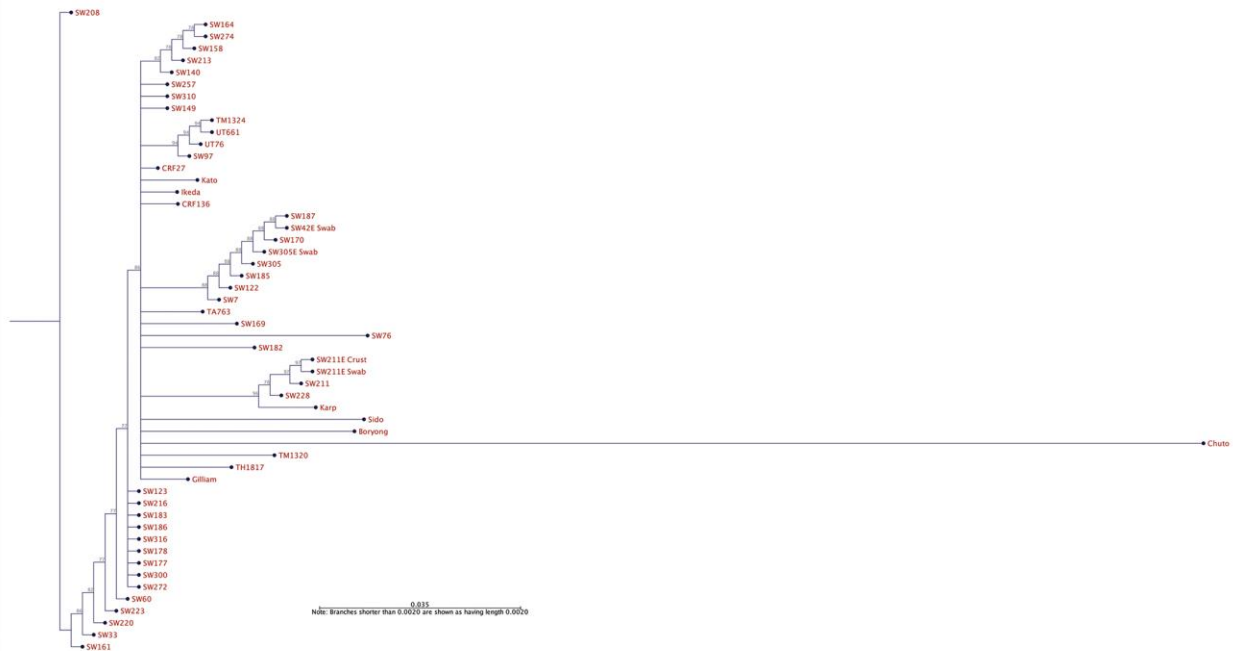

**Technical Appendix Figure.** Phylogenetic tree constructed using the 47-kDa sequences obtained from clinical samples in this study. There was no evidence for new or highly divergent strains based on homologies of the more conserved 47kDa *htra* gene sequences, and *O. chuto* sp. nov. remains a distinct outlier. The scale bar length segment with the number 0.035 shows the length of branch that represents that amount of genetic change (i.e., 3.5% or 7 nucleotides change/200 nucleotide sites); branches shorter than 0.002 are shown as having a length of 0.002.
